# Supplementary material
Source: PubMed Central journal article supplement (PMC5365667)
Supplement: AAC.01938-16_zac004176034s1.pdf [file AAC.01938-16_zac004176034s1.pdf]

# Supplemental Table 1

Supplemental Table 1. *P. aeruginosa* strain isolate information.

| <b><i>P. aeruginosa</i><br/>Strain</b> | <b>Source</b>               |
|----------------------------------------|-----------------------------|
| <b>PAO1</b>                            | Infected wound (ATCC 15692) |
| <b>PA103</b>                           | Sputum (ATCC 29260)         |
| <b>H25815</b>                          | Tracheal aspirate           |
| <b>H28822</b>                          | Catheterized urine          |
| <b>M57-15</b>                          | Mucoid CF isolate           |
| <b>M69781</b>                          | Sputum                      |
| <b>T63621</b>                          | Tracheal aspirate           |
| <b>W40423</b>                          | Sputum                      |
| <b>W41033</b>                          | Urine                       |
| <b>W43532</b>                          | Bronchial washing           |

## Supplemental Table 2

| Target      | NCBI Gene ID | Number Designation | Base Sequence (5' to 3') | Location on gene relative to start site | 5' End                                     | 3' End                |
|-------------|--------------|--------------------|--------------------------|-----------------------------------------|--------------------------------------------|-----------------------|
| <i>AcpP</i> | 879895       | -0206              | CAT ACC TTG TT           | -8 to +3                                | TEG                                        | (RXR) <sub>4</sub> XB |
| <i>AcpP</i> | 879895       | -0307              | CTC ATA CCT TG           | -6 to +5                                | H                                          | (RXR) <sub>4</sub> XB |
| <i>AcpP</i> | 879895       | -0445              | CTC ATA CCT TG           | -6 to +5                                | (RXR) <sub>4</sub> XB                      | H                     |
| <i>AcpP</i> | 879895       | -0446              | CTC ATA CCT TG           | -6 to +5                                | (RGR) <sub>4</sub> XB                      | H                     |
| <i>AcpP</i> | 879895       | -0447              | CTC ATA CCT TG           | -6 to +5                                | (RFR) <sub>4</sub> XB                      | H                     |
| <i>LpxC</i> | 881292       | -0251              | GTT GTT TGA TC           | +3 to +13                               | (RXR) <sub>4</sub> XB                      | H                     |
| <i>LpxC</i> | 881292       | -0505              | GTT GTT TGA TC           | +3 to +13                               | TEG                                        | (RXR) <sub>4</sub> XB |
| <i>RpsJ</i> | 881717       | -0066              | CCT CAG ACT CC           | -15 to -5                               | (RXR) <sub>4</sub> XB                      | H                     |
| <i>RpsJ</i> | 881717       | -0067              | CCT CAG ACT CC           | -15 to -5                               | R6G                                        | H                     |
| <i>RpsJ</i> | 881717       | -0207              | CCT CAG ACT CC           | -15 to -5                               | TEG                                        | (RGR) <sub>4</sub> XB |
| <i>RpsJ</i> | 881717       | -0208              | CCT CAG ACT CC           | -15 to -5                               | TEG                                        | R6G                   |
| <i>RpsJ</i> | 881717       | -0209              | GCA TTT GAC CT           | -7 to +4                                | TEG                                        | (RXR) <sub>4</sub> XB |
| <i>RpsJ</i> | 881717       | -0249              | GCA TTT GAC CT           | -7 to +4                                | (RXR) <sub>4</sub> XB                      | H                     |
| <i>RpsJ</i> | 881717       | -0308              | CCT CAG ACT CC           | -15 to -5                               | H                                          | (RXR) <sub>4</sub> XB |
| <i>RpsJ</i> | 881717       | -0371              | GCA TTT GAC CT           | -7 to +4                                | R6G                                        | H                     |
| <i>RpsJ</i> | 881717       | -0628              | CCT CAG ACT CC           | -15 to -5                               | (dRdFdF) <sub>3</sub> XB (D amino acids)   | Acetyl                |
| <i>RpsJ</i> | 881717       | -0629              | CCT CAG ACT CC           | -15 to -5                               | (dRdFdF) <sub>3</sub> dRXB (D amino acids) | Acetyl                |
| <i>RpsJ</i> | 881717       | -0630              | CCT CAG ACT CC           | -15 to -5                               | (dRXdR) <sub>4</sub> XB                    | Acetyl                |
| <i>RpsJ</i> | 881717       | -0631              | CCT CAG ACT CC           | -15 to -5                               | R8B (D amino acids)                        | Acetyl                |
| <i>RpsJ</i> | 881717       | -0632              | CCT CAG ACT CC           | -15 to -5                               | dR6G (D amino acids)                       | Acetyl                |
| <i>RpsJ</i> | 881717       | -1075              | CCT CAG ACT CC           | -15 to -5                               | TEG                                        | H                     |
| <i>Scr</i>  | N/A          | -0078              | ATC GTT GCA TC           | N/A                                     | (RXR) <sub>4</sub> XB                      | H                     |
| <i>Scr</i>  | N/A          | -0949              | TCT CAG ATG GT           | N/A                                     | TEG                                        | (RXR) <sub>4</sub> XB |
| <i>Scr</i>  | N/A          | -1073              | TCT CAG ATG GT           | N/A                                     | (RXR) <sub>4</sub> XB                      | H                     |

### Supplemental Table 2. PPMOs.

PPMOs are listed in alphabetical and numerical order. For the location relative to the start site we defined 'A' of ATG as +1. Non-common abbreviations are as follows – X: 6-amino hexanoic acid (aminocaproic acid), B: Beta-alanine (for conjugation), d: prefix for non-natural stereoisomer form of an amino acid, TEG: Triethylene glycol, Scr: Scramble.

# Supplemental Figure 1

(a) MICs of PPMOs in MH II media

| Strain ID                   | Species              | PPMOs     |           |           |           |           |           |           |           |           |           |           |           |     |
|-----------------------------|----------------------|-----------|-----------|-----------|-----------|-----------|-----------|-----------|-----------|-----------|-----------|-----------|-----------|-----|
|                             |                      | AcpP-0206 | AcpP-0445 | LpxC-0251 | LpxC-0505 | RpsJ-0066 | RpsJ-0207 | RpsJ-0208 | RpsJ-0209 | RpsJ-0628 | RpsJ-0629 | RpsJ-0630 | RpsJ-0632 |     |
| PAO1                        | <i>P. aeruginosa</i> | >16       | NT        | NT        | >16       | NT        | >16       | >16       | >16       | >16       | >16       | >16       | >16       | >16 |
| H25815                      | <i>P. aeruginosa</i> | >16       | NT        | NT        | >16       | NT        | >16       | >16       | >16       | >16       | >16       | >16       | >16       | >16 |
| H28822                      | <i>P. aeruginosa</i> | >16       | NT        | NT        | >16       | NT        | >16       | >16       | >16       | >16       | >16       | >16       | >16       | >16 |
| M57-15                      | <i>P. aeruginosa</i> | >16       | NT        | NT        | >16       | NT        | >16       | >16       | >16       | >16       | >16       | >16       | >16       | >16 |
| M69781                      | <i>P. aeruginosa</i> | >16       | NT        | NT        | 8         | NT        | 4         | >16       | >16       | >16       | >16       | >16       | >16       | >16 |
| T63621                      | <i>P. aeruginosa</i> | >16       | NT        | NT        | >16       | NT        | >16       | >16       | >16       | >16       | >16       | >16       | >16       | >16 |
| W40423                      | <i>P. aeruginosa</i> | >16       | NT        | NT        | >16       | NT        | >16       | >16       | >16       | >16       | >16       | >16       | >16       | >16 |
| W41033                      | <i>P. aeruginosa</i> | >16       | NT        | NT        | >16       | NT        | >16       | >16       | >16       | >16       | >16       | >16       | >16       | >16 |
| W43532                      | <i>P. aeruginosa</i> | >16       | NT        | NT        | >16       | NT        | >16       | >16       | >16       | >16       | >16       | >16       | >16       | >16 |
| PPMO MIC <sub>50</sub> [μM] |                      | >16       | NT        | NT        | >16       | NT        | >16       | >16       | >16       | >16       | >16       | >16       | >16       | >16 |

Key

|      |            |
|------|------------|
| NT   | Not Tested |
| >16  | >16 μM     |
| 16   | 16 μM      |
| 8    | 8 μM       |
| 4    | 4 μM       |
| 2    | 2 μM       |
| 1    | 1 μM       |
| ≤0.5 | ≤0.5 μM    |

(b) MICs of PPMOs in MH II media with 1μg/ml Colistin

| Strain ID                   | Species              | PPMOs     |           |           |           |           |           |           |           |           |           |           |           | Colistin MIC (μg/mL) |   |
|-----------------------------|----------------------|-----------|-----------|-----------|-----------|-----------|-----------|-----------|-----------|-----------|-----------|-----------|-----------|----------------------|---|
|                             |                      | AcpP-0206 | AcpP-0445 | LpxC-0251 | LpxC-0505 | RpsJ-0066 | RpsJ-0207 | RpsJ-0208 | RpsJ-0209 | RpsJ-0628 | RpsJ-0629 | RpsJ-0630 | RpsJ-0632 |                      |   |
| PAO1                        | <i>P. aeruginosa</i> | 8         | NT        | NT        | 2         | NT        | 8         | >16       | >16       | 8         | >16       | 2         | 8         | 4                    | 4 |
| H25815                      | <i>P. aeruginosa</i> | ≤0.5      | NT        | NT        | ≤0.5      | NT        | ≤0.5      | 16        | 16        | ≤0.5      | ≤0.5      | ≤0.5      | ≤0.5      | ≤0.5                 | 8 |
| H28822                      | <i>P. aeruginosa</i> | NT                   | 2 |
| M57-15                      | <i>P. aeruginosa</i> | 1         | NT        | NT        | ≤0.5      | NT        | >16       | 4         | ≤0.5      | >16       | >16       | >16       | >16       | 1                    | 4 |
| M69781                      | <i>P. aeruginosa</i> | ≤0.5      | NT        | NT        | ≤0.5      | NT        | >16       | 1         | ≤0.5      | ≤0.5      | ≤0.5      | ≤0.5      | ≤0.5      | ≤0.5                 | 8 |
| T63621                      | <i>P. aeruginosa</i> | 4         | NT        | NT        | 2         | NT        | >16       | 8         | 2         | 4         | 8         | 2         | 2         | 2                    | 2 |
| W40423                      | <i>P. aeruginosa</i> | 4         | NT        | NT        | 2         | NT        | >16       | 16        | 2         | 8         | 16        | 2         | 2         | 4                    | 8 |
| W41033                      | <i>P. aeruginosa</i> | ≤0.5      | NT        | NT        | ≤0.5      | NT        | 16        | 2         | ≤0.5      | ≤0.5      | 8         | ≤0.5      | ≤0.5      | 1                    | 4 |
| W43532                      | <i>P. aeruginosa</i> | 2         | NT        | NT        | ≤0.5      | NT        | ≤0.5      | ≤0.5      | ≤0.5      | >16       | >16       | >16       | >16       | 2                    | 4 |
| PPMO MIC <sub>50</sub> [μM] |                      | 1         | NT        | NT        | ≤0.5      | NT        | 16        | 4         | ≤0.5      | 4         | 8         | 2         | 2         | 1                    | 4 |

(c) MICs of PPMOs in MH II media with 2μg/ml PMBN

| Strain ID                   | Species              | PPMOs     |           |           |           |           |           |           |           |           |           |           |           | PMBN MIC (μg/mL) |     |
|-----------------------------|----------------------|-----------|-----------|-----------|-----------|-----------|-----------|-----------|-----------|-----------|-----------|-----------|-----------|------------------|-----|
|                             |                      | AcpP-0206 | AcpP-0445 | LpxC-0251 | LpxC-0505 | RpsJ-0066 | RpsJ-0207 | RpsJ-0208 | RpsJ-0209 | RpsJ-0628 | RpsJ-0629 | RpsJ-0630 | RpsJ-0632 |                  |     |
| PAO1                        | <i>P. aeruginosa</i> | 4         | 2         | 2         | 2         | 2         | >16       | >16       | 4         | >16       | >16       | 4         | 8         | >16              | >16 |
| H25815                      | <i>P. aeruginosa</i> | ≤0.25     | ≤0.5      | 1         | 1         | ≤0.5      | ≤0.5      | 1         | ≤0.5      | 2         | 4         | ≤0.5      | 1         | 1                | >16 |
| H28822                      | <i>P. aeruginosa</i> | 16        | 2         | 2         | 1         | 8         | >16       | >16       | 4         | >16       | >16       | 4         | 16        | >16              | >16 |
| M57-15                      | <i>P. aeruginosa</i> | 2         | 1         | 2         | 2         | 2         | >16       | >16       | 16        | >16       | >16       | 4         | 8         | >16              | >16 |
| M69781                      | <i>P. aeruginosa</i> | 8         | 1         | 2         | ≤0.5      | 2         | 1         | 1         | ≤0.5      | 8         | 16        | ≤0.5      | ≤0.5      | 4                | 4   |
| T63621                      | <i>P. aeruginosa</i> | 8         | 1         | 2         | 8         | 2         | >16       | >16       | 8         | >16       | >16       | 4         | 8         | >16              | 4   |
| W40423                      | <i>P. aeruginosa</i> | 4         | 1         | 8         | 8         | 4         | >16       | >16       | 16        | >16       | >16       | 8         | >16       | >16              | 4   |
| W41033                      | <i>P. aeruginosa</i> | 4         | 1         | 4         | 16        | 2         | 4         | >16       | 16        | >16       | >16       | 8         | 8         | 16               | >16 |
| W43532                      | <i>P. aeruginosa</i> | 4         | 1         | 4         | 4         | 2         | 16        | 16        | 16        | >16       | >16       | 16        | 16        | >16              | >16 |
| PPMO MIC <sub>50</sub> [μM] |                      | 4         | 1         | 2         | 2         | 2         | >16       | >16       | 4         | >16       | >16       | 4         | 8         | >16              | >16 |

(d) MICs of PPMOs in MOPS media

| Strain ID                   | Species              | PPMOs     |           |           |           |           |           |           |           |           |           |           |           |     |
|-----------------------------|----------------------|-----------|-----------|-----------|-----------|-----------|-----------|-----------|-----------|-----------|-----------|-----------|-----------|-----|
|                             |                      | AcpP-0206 | AcpP-0445 | LpxC-0251 | LpxC-0505 | RpsJ-0066 | RpsJ-0207 | RpsJ-0208 | RpsJ-0209 | RpsJ-0628 | RpsJ-0629 | RpsJ-0630 | RpsJ-0632 |     |
| PAO1                        | <i>P. aeruginosa</i> | 1         | 1         | 2         | 4         | 1         | 16        | >16       | 8         | >16       | >16       | 4         | 8         | >16 |
| H25815                      | <i>P. aeruginosa</i> | 2         | 2         | 4         | 2         | 1         | 16        | 8         | 8         | >16       | >16       | 2         | 2         | 4   |
| H28822                      | <i>P. aeruginosa</i> | 4         | 1         | 2         | 4         | 1         | 8         | >16       | 4         | >16       | >16       | 8         | 8         | >16 |
| M57-15                      | <i>P. aeruginosa</i> | 2         | 1         | 2         | 4         | ≤0.5      | 8         | >16       | 8         | >16       | >16       | 4         | 8         | 16  |
| M69781                      | <i>P. aeruginosa</i> | 4         | 1         | 1         | 2         | ≤0.5      | 1         | 4         | 1         | >16       | >16       | 2         | 1         | 4   |
| T63621                      | <i>P. aeruginosa</i> | 1         | 1         | 4         | 4         | 1         | 16        | >16       | 4         | >16       | >16       | 4         | 2         | >16 |
| W40423                      | <i>P. aeruginosa</i> | ≤0.5      | 1         | 1         | 1         | ≤0.5      | 1         | 2         | 1         | >16       | >16       | 1         | 2         | 1   |
| W41033                      | <i>P. aeruginosa</i> | 4         | 2         | 4         | 8         | 1         | 8         | >16       | 4         | >16       | >16       | 8         | 2         | >16 |
| W43532                      | <i>P. aeruginosa</i> | 2         | 1         | 2         | 8         | ≤0.5      | 16        | >16       | 4         | >16       | >16       | 8         | 4         | >16 |
| PPMO MIC <sub>50</sub> [μM] |                      | 2         | 1         | 2         | 4         | 1         | 8         | >16       | 4         | >16       | >16       | 4         | 2         | >16 |

## Supplemental Figure 1. Heatmaps of *P. aeruginosa* growth inhibition by PPMOs.

Heatmaps of PPMO MICs in *P. aeruginosa* strains grown in MHII (a), MHII in the presence of sub-inhibitory concentrations of colistin (b), MHII in the presence of sub-inhibitory concentrations of PMBN (c), or MOPS minimal media (d). Tested PPMOs had minimal activity against *Pseudomonas* grown in MHII alone but the addition of sub-inhibitory concentrations of colistin, PMBN, or growth in MOPS resulted in enhanced antimicrobial inhibition.

## Supplemental Figure 2



### Supplemental Figure 2: Lead PPMOs against *P. aeruginosa* are bactericidal.

MBC assays of lead PPMOs against PAO1 (a) and M57-15 (b), at 0.5-, 1-, 2-, and 4-times the MIC. Grey-line underlays represent a 3-log CFU reduction as compared to starting inoculum. Positive control is 24 hr culture growth without any treatment. These data are combined results from at least 3 experiments.

# Supplemental Figure 3



## Supplemental Figure 3: PPMO treatment prevents formation of *P. aeruginosa* biofilm.

PAO1-GFP was grown in MBEC plates in the conditions indicated. Optical density measurements of crystal violet stained biofilm formations grown in MHII (a) or in MHII with 2 µg/mL PMBN (b). Dashed line represents the lower limit of detection. This data is combined from 3 independent experiments, error bars represent standard deviation, and statistics were done with a one-way ANOVA and Holm-Šidák's multiple comparisons test where \*\*  $p < 0.0001$  and \*  $p < 0.05$  is indicated for (a) as compared to PAO1 Alone (a) and as compared PAO1+PMBN (b). Spinning disk confocal microscopy images of MBEC pegs are depicted from above and the side incubated in MHII (c), or MHII with 2 µg/mL PMBN (d). Green indicates PAO1-GFP and red is biofilm stained with Concanavalin A-Alexafluor 647.

## Supplemental Figure 4

| PPMO ( $\mu$ M)  | <i>P. aeruginosa</i> Strain |        |        | Antibiotic ( $\mu$ g/mL) | <i>P. aeruginosa</i> Strain |        |        |
|------------------|-----------------------------|--------|--------|--------------------------|-----------------------------|--------|--------|
|                  | PAO1                        | M57-15 | W43532 |                          | PAO1                        | M57-15 | W43532 |
| <b>AcpP-0445</b> | 8                           | 8      | 4      | <b>Pip/Tazo</b>          | 4.00                        | 4.00   | 4.00   |
| <b>LpxC-0251</b> | 16                          | 16     | 8      | <b>Tobramycin</b>        | 0.50                        | 0.50   | 0.50   |
| <b>RpsJ-0066</b> | 8                           | 32     | 32     | <b>Levofloxacin</b>      | 0.50                        | 0.25   | 0.25   |
| <b>Scr-1073</b>  | >128                        | >128   | >128   | <b>Colistin</b>          | 4.00                        | 4.00   | 4.00   |

### Supplemental Figure 4. MICs of PPMOs and Antibiotics used in Synergy assays.

Three strains of *P. aeruginosa*, PAO1, M57-15, and W43532 were utilized to examine if PPMOs could act favorably with current therapeutic antibiotics (Figure 5); these data are the individual MICs of compounds tested. Data shown here is representative of 3 independent experiments.
